# Supplementary material for: Saving Legs & Lives: the efficacy of a community-based cardiovascular rehabilitation programme versus usual care on exercise capacity and quality of life in patients who have undergone lower limb revascularisation for peripheral arterial disease—protocol for a single-centre randomised-controlled trial
Source: PubMed Central journal article supplement — BMJ Open. 2024 Dec 5;14(12):e089203. doi: 10.1136/bmjopen-2024-089203 (PMC11624831; doi:10.1136/bmjopen-2024-089203), 2024-12-05
Supplement: bmjopen-14-12-s001.pdf [file bmjopen-14-12-s001.pdf]

**Supplementary Table 1. Cardiovascular rehabilitation exercise program**

| Week                                                                                                                                                                                                                                                                                                                                                                                                 | Treadmill walking |               |            | Lower limb resistance exercises                                                                                                                                                                                                                                                                                                                              |      |             |            | Upper body continuous movements / activities                                                                                                                                                                                                                                                                                                                                                                   |      |          |            |
|------------------------------------------------------------------------------------------------------------------------------------------------------------------------------------------------------------------------------------------------------------------------------------------------------------------------------------------------------------------------------------------------------|-------------------|---------------|------------|--------------------------------------------------------------------------------------------------------------------------------------------------------------------------------------------------------------------------------------------------------------------------------------------------------------------------------------------------------------|------|-------------|------------|----------------------------------------------------------------------------------------------------------------------------------------------------------------------------------------------------------------------------------------------------------------------------------------------------------------------------------------------------------------------------------------------------------------|------|----------|------------|
|                                                                                                                                                                                                                                                                                                                                                                                                      | Walking bouts     | Bout duration | Total time | Exercise                                                                                                                                                                                                                                                                                                                                                     | Sets | Repetitions | Total time | Exercise                                                                                                                                                                                                                                                                                                                                                                                                       | Sets | Duration | Total time |
| 1                                                                                                                                                                                                                                                                                                                                                                                                    | 5                 | 2 minutes     | 10 minutes | 1) Sit-to-stand                                                                                                                                                                                                                                                                                                                                              | 2    | 12          | 10 minutes | 1) Upright rowing (dumbbells)                                                                                                                                                                                                                                                                                                                                                                                  | 4    | 1 minute | 20 minutes |
|                                                                                                                                                                                                                                                                                                                                                                                                      |                   |               |            | 2) Seated leg extensions                                                                                                                                                                                                                                                                                                                                     | 2    | 12          |            | 2) Arm cycling                                                                                                                                                                                                                                                                                                                                                                                                 | 3    | 1 minute |            |
|                                                                                                                                                                                                                                                                                                                                                                                                      |                   |               |            | 3) Standing calf raises                                                                                                                                                                                                                                                                                                                                      | 1    | 12          |            | 3) Ski ergometry                                                                                                                                                                                                                                                                                                                                                                                               | 3    | 1 minute |            |
| 2                                                                                                                                                                                                                                                                                                                                                                                                    | 7                 | 2 minutes     | 14 minutes | 1) Sit-to-stand                                                                                                                                                                                                                                                                                                                                              | 2    | 12          | 12 minutes | 1) Upright rowing (dumbbells)                                                                                                                                                                                                                                                                                                                                                                                  | 3    | 1 minute | 14 minutes |
|                                                                                                                                                                                                                                                                                                                                                                                                      |                   |               |            | 2) Seated leg extensions                                                                                                                                                                                                                                                                                                                                     | 2    | 12          |            | 2) Arm cycling                                                                                                                                                                                                                                                                                                                                                                                                 | 2    | 1 minute |            |
|                                                                                                                                                                                                                                                                                                                                                                                                      |                   |               |            | 3) Standing calf raises                                                                                                                                                                                                                                                                                                                                      | 2    | 12          |            | 3) Ski ergometry                                                                                                                                                                                                                                                                                                                                                                                               | 2    | 1 minute |            |
| 3                                                                                                                                                                                                                                                                                                                                                                                                    | 10                | 2 minutes     | 20 minutes | 1) Sit-to-stand                                                                                                                                                                                                                                                                                                                                              | 2    | 12          | 10 minutes | 1) Upright rowing (dumbbells)                                                                                                                                                                                                                                                                                                                                                                                  | 2    | 1 minute | 10 minutes |
|                                                                                                                                                                                                                                                                                                                                                                                                      |                   |               |            | 2) Seated leg extensions                                                                                                                                                                                                                                                                                                                                     | 2    | 12          |            | 2) Arm cycling                                                                                                                                                                                                                                                                                                                                                                                                 | 2    | 1 minute |            |
|                                                                                                                                                                                                                                                                                                                                                                                                      |                   |               |            | 3) Standing calf raises                                                                                                                                                                                                                                                                                                                                      | 1    | 12          |            | 3) Ski ergometry                                                                                                                                                                                                                                                                                                                                                                                               | 1    | 1 minute |            |
| 4                                                                                                                                                                                                                                                                                                                                                                                                    | 12                | 2 minutes     | 24 minutes | 1) Sit-to-stand                                                                                                                                                                                                                                                                                                                                              | 2    | 12          | 8 minutes  | 1) Upright rowing (dumbbells)                                                                                                                                                                                                                                                                                                                                                                                  | 2    | 1 minute | 8 minutes  |
|                                                                                                                                                                                                                                                                                                                                                                                                      |                   |               |            | 2) Standing calf raises                                                                                                                                                                                                                                                                                                                                      | 2    | 12          |            | 2) Arm cycling                                                                                                                                                                                                                                                                                                                                                                                                 | 2    | 1 minute |            |
| 5                                                                                                                                                                                                                                                                                                                                                                                                    | 14                | 2 minutes     | 28 minutes | 1) Sit-to-stand                                                                                                                                                                                                                                                                                                                                              | 2    | 12          | 6 minutes  | 1) Upright rowing (dumbbells)                                                                                                                                                                                                                                                                                                                                                                                  | 2    | 1 minute | 6 minutes  |
|                                                                                                                                                                                                                                                                                                                                                                                                      |                   |               |            | 2) Standing calf raises                                                                                                                                                                                                                                                                                                                                      | 1    | 12          |            | 2) Arm cycling                                                                                                                                                                                                                                                                                                                                                                                                 | 1    | 1 minute |            |
| 6                                                                                                                                                                                                                                                                                                                                                                                                    | 15                | 2 minutes     | 30 minutes | 1) Sit-to-stand                                                                                                                                                                                                                                                                                                                                              | 1    | 12          | 4 minutes  | 1) Upright rowing (dumbbells)                                                                                                                                                                                                                                                                                                                                                                                  | 2    | 1 minute | 6 minutes  |
|                                                                                                                                                                                                                                                                                                                                                                                                      |                   |               |            | 2) Standing calf raises                                                                                                                                                                                                                                                                                                                                      | 1    | 12          |            | 2) Arm cycling                                                                                                                                                                                                                                                                                                                                                                                                 | 1    | 1 minute |            |
| <b>Intensity progression criteria</b>                                                                                                                                                                                                                                                                                                                                                                |                   |               |            | <b>Intensity progression criteria</b>                                                                                                                                                                                                                                                                                                                        |      |             |            | <b>Program progression criteria</b>                                                                                                                                                                                                                                                                                                                                                                            |      |          |            |
| Adjust speed and/or gradient of treadmill to increase the power output by 10 watts for the next walking bout if: <ul style="list-style-type: none"> <li>Participant completes walking bout without reaching near-maximal claudication pain (number 3-4 on claudication pain scale) or rate of perceived exertion on Borg scale is less than 3 (out of 10) by the end of the walking bout.</li> </ul> |                   |               |            | Increase repetitions and/or weight for the next set if: <ul style="list-style-type: none"> <li>Participant is able to perform 12 repetitions with ease and optimal exercise technique</li> <li>Exercise does not induce moderate to near-maximal claudication pain or rate of perceived exertion is less than 3 (out of 10) by the end of the set</li> </ul> |      |             |            | The aim of the upper body activities / exercises is to provide a break in between treadmill walking and lower limb resistance exercises. <ul style="list-style-type: none"> <li>To progress the exercise program, reduce upper body activity time and increase treadmill walking time</li> <li>To regress the exercise program, reduce treadmill walking time and increase upper body activity time</li> </ul> |      |          |            |
| Adjust speed and/or gradient of treadmill to decrease the power output by 10 watts for the next walking bout if: <ul style="list-style-type: none"> <li>Participant fails to complete walking bout</li> <li>Heart rate exceeds 90% of predicted maximum heart rate for 30 seconds</li> <li>Rate of perceived exertion is 8 or higher (out of 10)</li> </ul>                                          |                   |               |            | Decrease repetitions and/or weight for the next set if: <ul style="list-style-type: none"> <li>Participant is unable to complete the set with optimal exercise technique</li> <li>Rate of perceived exertion is 8 or above (out of 10)</li> </ul>                                                                                                            |      |             |            |                                                                                                                                                                                                                                                                                                                                                                                                                |      |          |            |
| Note: If the participant fails to complete a walking bout, provide up to 30 seconds of rest or rest up to the end of the bout and then resume exercise program.                                                                                                                                                                                                                                      |                   |               |            |                                                                                                                                                                                                                                                                                                                                                              |      |             |            |                                                                                                                                                                                                                                                                                                                                                                                                                |      |          |            |
